# Supplementary material for: Prenatal Maternal Distress and Allergic Diseases in Offspring: Review of Evidence and Possible Pathways
Source: PubMed Central journal article supplement — Allergy Asthma Immunol Res. 2017 Feb 16;9(3):200–11. doi: 10.4168/aair.2017.9.3.200 (PMC5352571; doi:10.4168/aair.2017.9.3.200), 2017-02-16
Supplement: aair-9-200-s001.pdf [file aair-9-200-s001.pdf]

## SUPPLEMENTARY MATERIAL

**Supplementary Table.** Searching strategies and outcomes in the PubMed database

| Keyword                                                      | Search | Query                                                                                                                                                                                                                                                                                                | Items found |
|--------------------------------------------------------------|--------|------------------------------------------------------------------------------------------------------------------------------------------------------------------------------------------------------------------------------------------------------------------------------------------------------|-------------|
| Prenatal maternal stress                                     | #1     | (("mothers"[MeSH Terms] OR "maternal"[All Fields] OR "parental"[All Fields]) OR ("Prenatal Exposure Delayed Effects"[MeSH Terms] OR "prenatal"[All Fields])) AND (("stress, psychological"[MeSH Terms] OR "stress, physiological"[MeSH Terms] OR "stress"[All Fields]) OR "life events"[All Fields]) | 22,227      |
| Asthma                                                       | #2     | ("asthma"[MeSH Terms] OR "asthma"[All Fields] OR "bronchial asthma"[All Fields]) OR ("respiratory sounds"[MeSH Terms] OR "wheeze"[All Fields] OR "wheezing"[All Fields])                                                                                                                             | 168,840     |
| Allergic rhinitis                                            | #3     | ("rhinitis, allergic"[MeSH Terms] OR ("allergic rhinitis"[All Fields] OR "hay fever"[All fields]))                                                                                                                                                                                                   | 25,073      |
| Atopic dermatitis                                            | #4     | ("dermatitis, atopic"[MeSH Terms] OR "atopic dermatitis"[All Fields]) OR (("atopic"[All Fields] OR "infantile"[All Fields]) AND "eczema"[All Fields])                                                                                                                                                | 23,053      |
| Food allergy                                                 | #5     | "food hypersensitivity"[MeSH Terms] OR ("food"[All Fields] AND "hypersensitivity"[All Fields]) OR "food hypersensitivity"[All Fields] OR ("food"[All Fields] AND "allergy"[All Fields]) OR "food allergy"[All Fields]                                                                                | 23,702      |
| Allergic conjunctivitis                                      | #6     | "conjunctivitis, allergic"[MeSH Terms] OR "allergic conjunctivitis"[All Fields] OR "allergic rhinoconjunctivitis"[All Fields]                                                                                                                                                                        | 3,906       |
| Allergic diseases offspring                                  | #7     | #2 OR #3 OR #4 OR #5 OR #6                                                                                                                                                                                                                                                                           | 219,511     |
|                                                              | #8     | ("Child"[MeSH Terms] OR "Children"[All fields] OR "childhood"[All Fields]) OR "Child of Impaired Parents"[MeSH Terms] OR "offspring"[All Fields]                                                                                                                                                     | 2,005,803   |
| Allergic diseases in offspring                               | #9     | #7 AND #8                                                                                                                                                                                                                                                                                            | 63,985      |
| Prenatal maternal stress, and allergic diseases in offspring | #10    | #1 AND #9                                                                                                                                                                                                                                                                                            | 238         |
